# Supplementary material
Source: HighWire-hosted journal article supplement (https://www.annfammed.org/highwire/filestream/7371/field_highwire_adjunct_files/0/McMullin_suppl_Fig_1.pdf)
Supplement: McMullin_suppl_Fig_1.pdf [file McMullin_suppl_Fig_1.pdf]

**Online Supplementary Material**

McMullin ST, Lonergan TP, Rynearson CS, Doerr TD, Veregge PA, Scanlan ES. Impact of an evidence-based computerized decision support system on primary care prescription costs. *Ann Fam Med*. 2004;2:494-498.

<http://www.annfammed.org/cgi/content/full/2/5/494/DC1>

**Figure 1. Prewritten prescriptions most appropriate for gastroesophageal reflux, with a brief, diagnosis-specific message.**

| <a href="#">Today</a> <a href="#">Pt Search</a> <a href="#">Logoff</a> <a href="#">Help</a> <span style="float: right;"><a href="#">Select Rx by Class</a> <a href="#">Search for other Drug</a> <a href="#">Dx Only</a></span> |                      |                                         |  |     |       |     |                         |                             |
|---------------------------------------------------------------------------------------------------------------------------------------------------------------------------------------------------------------------------------|----------------------|-----------------------------------------|--|-----|-------|-----|-------------------------|-----------------------------|
| <b>Top Rx for 530.81 : ESOPHAGEAL REFLUX</b>                                                                                                                                                                                    |                      |                                         |  |     |       |     | <a href="#">PT Info</a> | <a href="#">EB Info</a>     |
| Form                                                                                                                                                                                                                            | Drug/Dosage Name     |                                         |  | SIG | Qty   | Ref | PRN                     |                             |
| <b><u>Ranitidine (\$11/mo) as effective as PPIs (\$115/mo) in most people with persistent heartburn</u></b>                                                                                                                     |                      |                                         |  |     |       |     |                         |                             |
| <a href="#">Edit</a>                                                                                                                                                                                                            | <a href="#">Pref</a> | <a href="#">RANITIDINE 150MG TABLET</a> |  |     | 1 BID | 60  | 3                       | N <a href="#">Drug Info</a> |
| <a href="#">Edit</a>                                                                                                                                                                                                            | <a href="#">Pref</a> | <a href="#">RANITIDINE 300MG TABLET</a> |  |     | 1 BID | 60  | 3                       | N <a href="#">Drug Info</a> |
| <a href="#">Edit</a>                                                                                                                                                                                                            | <a href="#">Pref</a> | <a href="#">FAMOTIDINE 20MG TABLET</a>  |  |     | 1 BID | 60  | 3                       | N <a href="#">Drug Info</a> |
| <a href="#">Edit</a>                                                                                                                                                                                                            | <a href="#">Pref</a> | <a href="#">FAMOTIDINE 40MG TABLET</a>  |  |     | 1 BID | 60  | 3                       | N <a href="#">Drug Info</a> |
| <a href="#">Edit</a>                                                                                                                                                                                                            | <a href="#">Cov</a>  | <a href="#">PROTONIX 40MG TABLET</a>    |  |     | 1 QD  | 30  | 3                       | N <a href="#">Drug Info</a> |
| <a href="#">Edit</a>                                                                                                                                                                                                            | <a href="#">Pref</a> | <a href="#">OMEPRAZOLE 20MG CAPSULE</a> |  |     | 1 QD  | 30  | 3                       | N <a href="#">Drug Info</a> |
| <a href="#">Edit</a>                                                                                                                                                                                                            | <a href="#">Pref</a> | <a href="#">PREVACID 30MG CAPSULE</a>   |  |     | 1 QD  | 30  | 3                       | N <a href="#">Drug Info</a> |
| <a href="#">Edit</a>                                                                                                                                                                                                            | <a href="#">Pref</a> | <a href="#">ACIPHEX 20MG TABLET</a>     |  |     | 1 QD  | 30  | 3                       | N <a href="#">Drug Info</a> |
| <a href="#">Today</a> <a href="#">Pt Search</a> <a href="#">Logoff</a> <a href="#">Help</a> <span style="float: right;"><a href="#">Select Rx by Class</a> <a href="#">Search for other Drug</a> <a href="#">Dx Only</a></span> |                      |                                         |  |     |       |     |                         |                             |

After a diagnosis is selected, the clinician is presented with a screen that contains a brief clinical message (underlined sentence in top third of screen), prewritten prescriptions, formulary information (Form) and links to patient education materials (PT info), therapeutic reviews (EB Info), and drug monographs (Drug Info). PPIs = proton pump inhibitors, Pt = patient, Rx = prescription, Dx = diagnosis.
